# Supplementary material for: Assessing the quality of anti-malarial drugs from Gabonese pharmacies using the MiniLab®: a field study
Source: PubMed Central journal article supplement (PMC4501108; doi:10.1186/s12936-015-0795-z), 2015-07-15
Supplement: 12936_2015_795_MOESM3_ESM.pdf [file 12936_2015_795_MOESM3_ESM.pdf]

**ASSESSMENT SHEET  
SCIENTIFIC REVIEW COMMITTEE OF THE CERMEL,  
ALBERT SCHWEITZER HOSPITAL**

|                                   |                                           |
|-----------------------------------|-------------------------------------------|
| <b>SRC-Number</b>                 | <b>2013.11</b>                            |
| <b>Principal Investigator</b>     | <b>B.J. Visser</b>                        |
| <b>Corresponding Investigator</b> | <b>Martin Grobusch</b>                    |
| <b>Date of Submission</b>         | <b>2013-10-03</b>                         |
| <b>Title</b>                      | <b>Antimalarial drug quality in Gabon</b> |
| <b>Acronym</b>                    | <b>AMQUAL</b>                             |

| <b>Overall Assessment</b>                | <b>Score<br/>Ok, n/a, clarification required</b>                    |
|------------------------------------------|---------------------------------------------------------------------|
| Scientific quality                       | OK                                                                  |
| Scientific interest                      | OK                                                                  |
| Ethical considerations                   | OK                                                                  |
| Feasibility of project                   | OK                                                                  |
| Relationship to MRU research policy      | OK                                                                  |
| Relationship to national research policy | OK                                                                  |
| Other issues                             | none                                                                |
| <b>Decision:</b>                         | <input checked="" type="checkbox"/> <b>Accepted without remarks</b> |
|                                          | <input type="checkbox"/> <b>Accepted with remarks</b>               |
|                                          | <input type="checkbox"/> <b>Resubmit</b>                            |
|                                          | <input type="checkbox"/> <b>Rejected</b>                            |

The investigators describe an important problem of international health sciences which has attracted considerable interest over the past decade. The SRC is grateful for the submission of the adapted documents and clarifications.

**Documents required:**

- Final Protocol**
- Informed Consent Form**
- Ethics Approval**
- Additional documents:**

**Name and Signature:**

**Date:**

*Michael Rando*

**2013-10-18**
